# Supplementary material for: Hydrotalcite: recyclable, novel heterogeneous catalyst for facile, environmentally benign and high yielding multi-component synthesis and mechanistic study under solvent free conditions
Source: Royal Society of Chemistry journal article supplement (doi:10.1039/c2cy20067h), 2012-01-01

## Supplementary Information for

# Hydrotalcite: recyclable, novel heterogeneous catalyst for facile, environmentally benign and high yielding multi-component synthesis and mechanistic study under solvent free conditions

Pramod Kumar Sahu,<sup>\*a, b</sup> Praveen Kumar Sahu,<sup>\*b, c</sup> Raginee Jain,<sup>b</sup> Ramjilal Yadav,<sup>a</sup> Dau Dayal Agarwal<sup>a, b, c</sup>

<sup>a</sup>*School of Studies in Chemistry, Jiwaji University, Gwalior-474011, Madhya Pradesh, India*

<sup>b</sup>*Department of Industrial Chemistry, Jiwaji University, Gwalior-474011, Madhya Pradesh, India*

<sup>c</sup>*Jagdishprasad Jhabarmal Tibrewala University, Churu Jhunjhunu Road, Chudela, District-Jhunjhunu-333001, Rajasthan, India*

\*To whom correspondence should be addressed: Telephone: +91-9993932425; Email: [sahu.chemistry@gmail.com](mailto:sahu.chemistry@gmail.com),

[praveensahu1234@gmail.com](mailto:praveensahu1234@gmail.com)

[sahu.chemistry@gmail.com](mailto:sahu.chemistry@gmail.com)

## XRD profiles of recovered Mg-Al-CO<sub>3</sub>

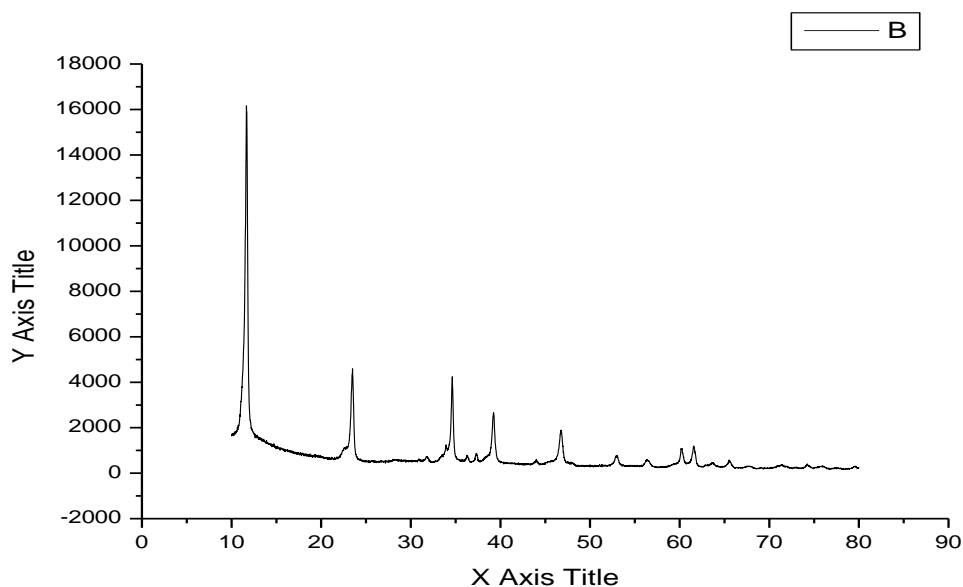

### XRD profiles of recovered Mg-Al-CO<sub>3</sub> (1:2)

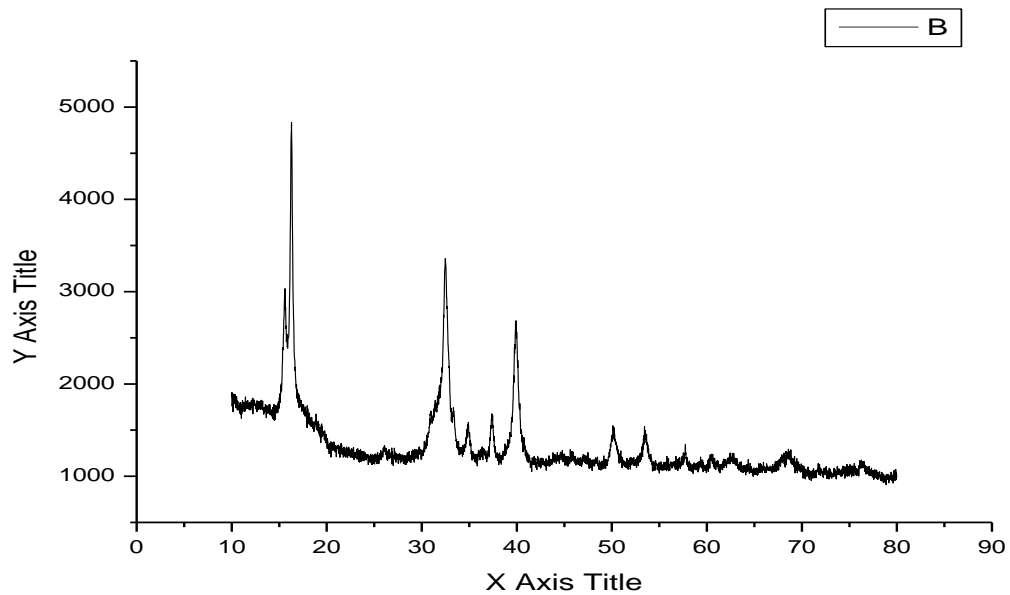

### XRD of Mg-Al-CO<sub>3</sub> (1:4)

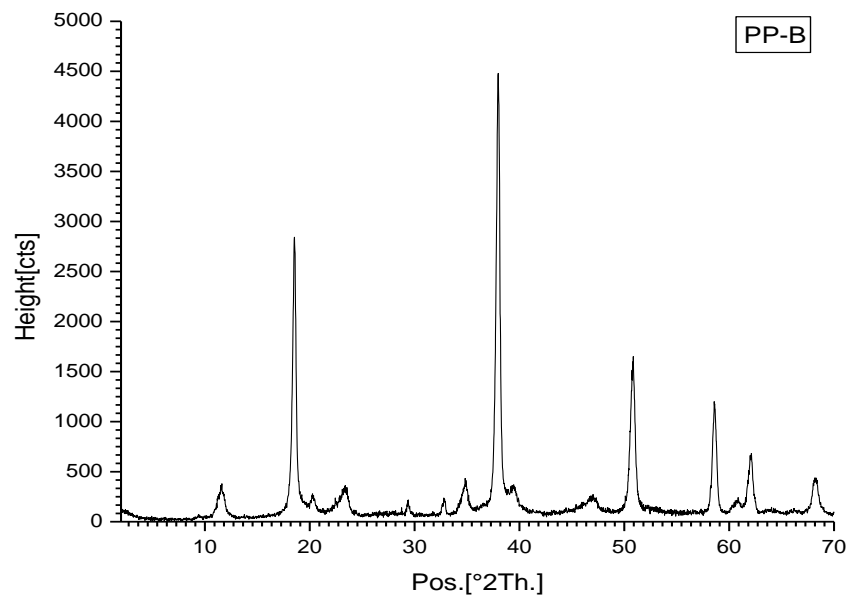

### XRD of Ca-Al-CO<sub>3</sub> (1:2)

12Apr12-S8

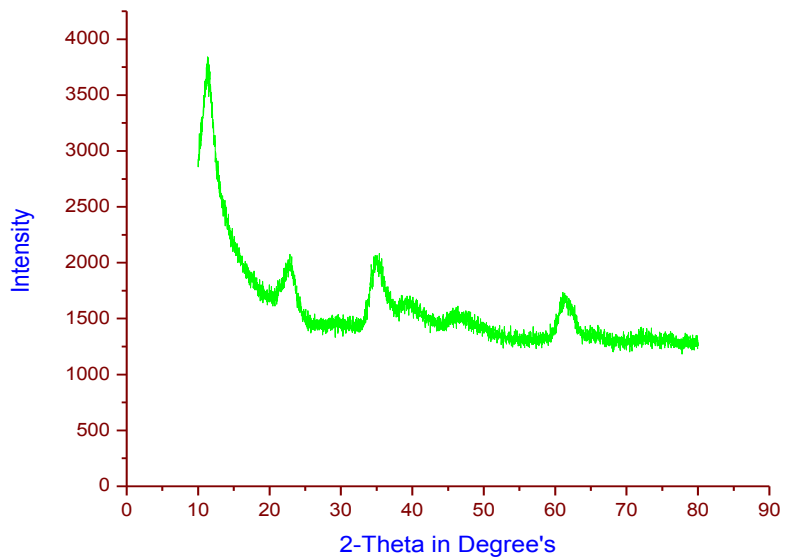

### XRD of Ca-Al-CO<sub>3</sub> (1:4)

12Apr12-S3

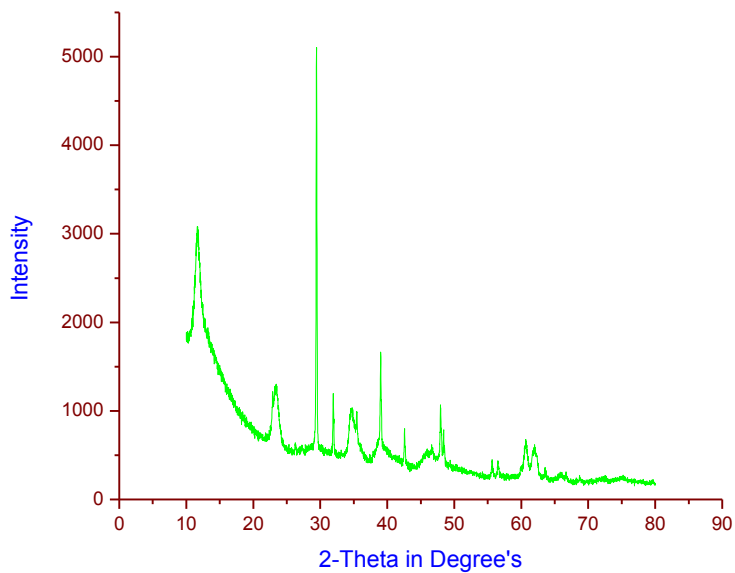

Supplement: c2cy20067h.pdf [file c2cy20067h.pdf]
